# Supplementary material
Source: PubMed Central journal article supplement (PMC3199972)
Supplement: NIHMS328904-supplement-1.pdf [file NIHMS328904-supplement-1.pdf]

**ONLINE SUPPLEMENT**

**A NOVEL ROLE FOR AN ENDOTHELIAL ADRENERGIC RECEPTOR SYSTEM IN  
MEDIATING CATECHOLESTRADIOL-INDUCED PROLIFERATION OF UTERINE  
ARTERY ENDOTHELIAL CELLS**

Sheikh O Jobe<sup>1</sup>, Sean N Fling<sup>1,4</sup>, Jayanth Ramadoss<sup>1</sup>, Ronald R Magness<sup>1,2,3</sup>

<sup>1</sup>Depts. of Ob/Gyn. Perinatal Research Laboratories, <sup>2</sup>Pediatrics and <sup>3</sup>Animal Sciences,  
University of Wisconsin-Madison, <sup>4</sup>Spelman College

Address correspondence and reprint request to:

Ronald R. Magness, PhD,

Department of Obstetrics and Gynecology,

Perinatal Research Laboratories,

Atrium B Meriter Hospital,

202 S. Park Street,

Madison, WI, 53715

Phone: (608) 417-6314

Fax: (608) 257-1304

E-mail: [rmagness@wisc.edu](mailto:rmagness@wisc.edu)

## **Expanded Materials and Methods:**

### **Materials:**

E<sub>2</sub>, 2-OHE<sub>2</sub> and 4-OHE<sub>2</sub> were purchased from Steraloids Inc., Newport, RI. BrdU Cell Proliferation Assays was obtained from EMD Chemicals Inc., Gibbstown, NJ. Propranolol, Yohimbine, ICI 118,551, SR 59230A, Formoterol and BRL 37344 were purchased from Tocris Bioscience, Ellisville, MO. Norepinephrine, epinephrine and phentolamine was purchased from Sigma-Aldrich, St. Louis, MO. Mouse anti- $\alpha_1$ -AR, rabbit anti- $\alpha_2$ -AR, rabbit anti- $\beta_1$ -AR, rabbit anti- $\beta_2$ -AR and rabbit anti- $\beta_3$ -AR were obtained from Santa Cruz Biotechnology Inc., Santa Cruz, CA.

### **Cell Preparation and Culture:**

All procedures and protocols for animal use were approved by the University of Wisconsin-Madison School of Medicine and Public Health Research Animal Care and Use Committee. UAECs were isolated from late gestation ewes (P); (120-130 days; term= 147 days; n=6) and nonpregnant (NP; luteal n= 3 and follicular n=3) ewes by collagenase digestion, cultured in growth media (DMEM with 20% FCS, 100 mg/ml penicillin, and 100 mg/ml streptomycin) as previously described.<sup>1,2</sup> Validations were conducted on each cell preparation for functional endothelial cell markers, PECAM-1, eNOS, LDL-uptake and smooth muscle myosin (negative control) as previously described.<sup>1,2</sup> UAECs (passages 3) were plated in T75 flasks containing phenol free Endothelial Basal Medium (EBM) serum free without growth factors (Lonza, Walkersville, MD), 20% FBS and 1% penicillin-streptomycin. Cells were grown to ~ 70% confluence and were at passage 4 when lysed for protein extraction/Western blotting or transferred to 96 well plates as needed for the respective experiments described below.

### **Protein Extraction and Western Immunoblotting:**

Protein extraction was performed on NP-UAECs or P-UAECs by lysing them in 400  $\mu$ l of lysis buffer (0.5 M Tris + 0.1 M EDTA + 0.15 M NaCl + 0.1% Tween-20 + 5 mg/ml aprotinin + 5 mg/ml leupeptin + 0.001 M PMSF). Total protein content was determined using BCA Protein Assay (Thermo Scientific, Rockford, IL). For Western blotting, 20  $\mu$ g protein/lane were boiled in SDS sample buffer for 5 min and electrophoresed on 4-20% gradient SDS-PAGE gels (Bio-Rad, Hercules, CA) for 100 min at 150 V. Separated proteins were then electrically (100 V, 30 min) transferred to a PVDF membrane. Non-specific binding was blocked with 5% fat-free milk in TBST (50 mM Tris-HCl, pH 7.5, 0.15 M NaCl, 0.05% Tween-20) for 120 min and incubated with primary antibodies (1  $\mu$ g/ml; 1:500) in TBST + 1% BSA for 120 min.  $\alpha_1$ -AR,  $\alpha_2$ -AR,  $\beta_1$ -AR,  $\beta_2$ -AR and  $\beta_3$ -AR proteins were detected using mouse anti- $\alpha_1$ -AR, rabbit anti- $\alpha_2$ -AR, rabbit anti- $\beta_1$ -AR, rabbit anti- $\beta_2$ -AR and rabbit anti- $\beta_3$ -AR. GAPDH and/or  $\beta$ -actin were utilized as a loading control. After washing, the membrane was incubated with the corresponding peroxidase-conjugated IgG for 60 min and detected with the Pierce ECL detection kit (Thermo Scientific, Waltham, MA).

### **Cell Proliferation Assays:**

5-Bromodeoxyuridine was added after 4 hours (i.e. 20 hours BrdU incubation) during the 24 hours of treatment and this *in vitro* index of proliferation was evaluated. Plates were read using Synergy HT Multi-Mode Microplate Reader. Results are expressed as the fold increases over untreated control after subtracting the "blank"(wells incubated without 5-bromodeoxyuridine). Validation of cell number increase and cytotoxicity after treatment was performed using ViaLight Plus High Sensitivity Cell Proliferation and Cytotoxicity Kit (Lonza Inc., Rockland, ME) according to manufacturer's instructions.<sup>2</sup> After 24 hour starvation and subsequent treatment in white opaque 96-well plates (24-hours), cells were lysed with Lysis Reagent (10 mins) to extract

ATP from cells. Then the appropriate amount of ATP Monitoring Reagent Plus was added (2 mins) in each well to generate luminescent signal. Plates were read using Synergy HT Multi-Mode Microplate Reader to determine luminescence and results expressed in Relative Light Units as fold increases over untreated control after subtracting the value of the blank against an ATP standard curve.

#### **Experimental Treatments: Blockade and Activation of $\alpha$ -ARs and/or $\beta$ -ARs:**

P-UAEC proliferation experiments were performed in quadruplicates and replicated in  $\geq$  four different P-UAEC preparations. For concentration-response studies, P-UAECs in 96-well plates were serum starved (24 hours) in EBM, washed with serum free EBM and medium was replaced with EBM or EBM containing 0.1, 1, 10 or 100 nmol/L of norepinephrine or epinephrine (24 hours) or 0.1 nmol/L of 2-OHE<sub>2</sub> or 4-OHE<sub>2</sub>. We specifically chose to study the concentration of 0.1 nmol/L for the catecholestradiols based on the dose-response curves from our previous study.<sup>2</sup> For specificities of all antagonists and agonist used in this study, please see table S1. The  $\alpha$ -ARs and/or  $\beta$ -ARs were blocked nonselectively by pretreating P-UAECs (10  $\mu$ mol/L; 1 hour) with either the  $\alpha$ -AR blocker phentolamine or the  $\beta$ -AR blocker propranolol followed by treatments with 0.1 nmol/L of norepinephrine and epinephrine or 2-OHE<sub>2</sub> or 4-OHE<sub>2</sub> (24 hours). Additional concentration studies to investigate AR activation with catecholamines alone or their interactive effects with catecholestradiols were evaluated by combining treatments of 0.1 nmol/L 2-OHE<sub>2</sub> or 4-OHE<sub>2</sub> with 0.1 nmol/L norepinephrine or epinephrine. Based on Western analyses expression of specific AR subtypes in P-UAECs, we conducted  $\alpha$ -ARs or  $\beta$ -ARs subtype specific blockade by selectively blocking (10  $\mu$ mol/L; 1 hr) with the  $\alpha_2$ -AR inhibitor yohimbine,  $\beta_2$ -AR antagonist ICI 118,551, and  $\beta_3$ -AR inhibitor SR 59230A followed by catecholestradiol treatments (0.1 nmol/L for 24 hours). We then performed validation studies of AR-subtype specific inhibition by evaluating P-UAEC mitogenic concentration responses using 0, 0.1, 1, 10, 100 nmol/L of the specific  $\beta_2$ -AR agonist Formoterol as well as the  $\beta_3$ -AR agonist BRL 37344. We also studied the effects of 1  $\mu$ mol/L of ICI 118,551 or SR 59230A on 100 nmol/L of Formoterol and BRL 37344 in order to further evaluate the mitogenic effects of receptor activation and specificity of  $\beta_2$  and  $\beta_3$ -AR selective agonists in P-UAECs.

#### **References:**

1. Bird IM, Sullivan JA, Di T, Cale JM, Zhang L, Zheng J, Magness RR. Pregnancy-dependent changes in cell signaling underlie changes in differential control of vasodilator production in uterine artery endothelial cells. *Endocrinology*. 2000; 141:1107-1117.
2. Jobe SO, Ramadoss J, Koch JM, Jiang Y, Zheng J, Magness RR. Estradiol-17 $\beta$  and its cytochrome P450- and catechol-O-methyltransferase-derived metabolites stimulate proliferation in uterine artery endothelial cells: Role of estrogen receptor-alpha versus estrogen receptor-beta. *Hypertension*. 2010; 55:1005-1011.
3. Meier R, Yonkman FF, Graver BN, Gross F. A New Imidazoline Derivative with Marked Adrenolytic Properties. *Proc Soc Exp Biol Med*. 1949; 71: 70-72.
4. Stoschitzky K, Lindner W, Kiowski W. Stereoselective vascular effects of the (R)- and (S)-enantiomers of propranolol and atenolol. *J Cardiovasc Pharmacol*. 1995; 25: 268-272.
5. Doxey JC, Lane AC, Roach AG, Virdee NK. Comparison of the alpha-adrenoceptor antagonist profiles of idazoxan (RX 781094), yohimbine, rauwolscine and corynanthine. *Naunyn Schmiedebergs Arch Pharmacol*. 1984; 325: 136-144.

6. Bilski AJ, Halliday SE, Fitzgerald JD, Wale JL. The pharmacology of a beta 2-selective adrenoceptor antagonist (ICI 118,551). *J Cardiovasc Pharmacol.* 1983; 5: 430-437.
7. Manara L, Badone D, Baroni M, Boccardi G, Cecchi R, Croci T, Giudice A, Guzzi U, Landi M, Le Fur G. Functional identification of rat atypical beta-adrenoceptors by the first beta 3-selective antagonists, aryloxypropanolaminotetralins. *Br J Pharmacol.* 1996; 117: 435-442.
8. Decker N, Quenedey MC, Rouot B, Schwartz J, Velly J. Effects of N-aralkyl substitution of beta-agonists on alpha- and beta-adrenoceptor subtypes: pharmacological studies and binding assays. *J Pharm Pharmacol.* 1982; 34: 107-112.
9. Oriowo MA, Chapman H, Kirkham DM, Sennitt MV, Ruffolo RR Jr, Cawthorne MA. The selectivity in vitro of the stereoisomers of the beta-3 adrenoceptor agonist BRL 37344. *J Pharmacol Exp Ther.* 1996; 277: 22-27.

Table S1:

| <b>Ligand Compound</b> | <b><math>\alpha</math>-AR/<math>\beta</math>-AR</b> | <b>Agonist/Antagonist</b> | <b>Binding Selectivity Relative to other ARs</b> | <b>Reference</b>                      |
|------------------------|-----------------------------------------------------|---------------------------|--------------------------------------------------|---------------------------------------|
| Phentolamine           | $\alpha$ -ARs                                       | Antagonist                | N/A                                              | Meier et al, 1949. <sup>3</sup>       |
| Propranolol            | $\beta$ -ARs                                        | Antagonist                | N/A                                              | Stoschitzky et al, 1995. <sup>4</sup> |
| Yohimbine              | $\alpha_2$ -ARs                                     | Antagonist                | N/A                                              | Doxey et al, 1984. <sup>5</sup>       |
| ICI 118,551            | $\beta_2$ -ARs                                      | Antagonist                | $\geq 100$ -fold                                 | Bilski et al, 1983. <sup>6</sup>      |
| SR59230A               | $\beta_3$ -ARs                                      | Antagonist                | $\geq 10$ -fold                                  | Manara et al, 1996. <sup>7</sup>      |
| Formoterol             | $\beta_2$ -ARs                                      | Agonist                   | $\geq 330$ -fold                                 | Decker et al, 1982. <sup>8</sup>      |
| BRL37344               | $\beta_3$ -ARs                                      | Agonist                   | $\geq 4$ -fold                                   | Oriowo et al, 1996. <sup>9</sup>      |

N/A means negligible binding selectivity and/or complete binding affinity to AR subtype
